## MINIREVIEW

# Yeast peroxisomes: structure, functions and biotechnological opportunities

Andriy A. Sibirny<sup>1,2,\*</sup>

<sup>1</sup>Department of Molecular Genetics and Biotechnology, Institute of Cell Biology, NAS of Ukraine, Drahomanov Street, 14/16, Lviv 79005, Ukraine and <sup>2</sup>Department of Biotechnology and Microbiology, University of Rzeszow, Zelwerowicza 4, Rzeszow 35-601, Poland

\*Corresponding author: University of Rzeszow, Department of Biotechnology and Microbiology, Zelwerowicza Street, 4, 35-601 Rzeszow, Poland.

Tel: +380 32 2612108; Fax: +380 32 2612148; E-mail: [sibirny@yahoo.com](mailto:sibirny@yahoo.com)

One sentence summary: Review describing properties of peroxisomes, including their biogenesis, inheritance, degradation, metabolic functions and potential use for biotechnological purposes.

Editor: Jens Nielsen

## ABSTRACT

Peroxisomes are ubiquitous organelles found in most eukaryotic cells. In yeasts, peroxisomes play important roles in cell metabolism, especially in different catabolic processes including fatty acid  $\beta$ -oxidation, the glyoxylic shunt and methanol metabolism, as well as some biosynthetic processes. In addition, peroxisomes are the compartment in which oxidases and catalase are localized. New peroxisomes mainly arise by fission of pre-existing ones, although they can also be formed from the endoplasmic reticulum (ER). Peroxisomes consist of matrix-soluble proteins and membrane proteins known as peroxins. A total of 34 PEX peroxin genes and proteins have been identified to date, and their functions have been elucidated. Protein import into peroxisomes depends on peroxins and requires specific signals in the structure of transported proteins: PTS1, PTS2 and mPTS. The mechanisms of metabolite penetration into peroxisomes are still poorly understood. Peroxisome number and the volume occupied by these organelles are tightly regulated. Methanol, fatty acids and methylamine act as efficient peroxisome proliferators, whereas glucose and ethanol induce peroxisome autophagic degradation (pexophagy). To date, 42 Atg proteins involved in pexophagy are known. Catabolism and alcoholic fermentation of the major pentose sugar, xylose, depend on peroxisomal enzymes. Overexpression of peroxisomal transketolase and transaldolase activates xylose fermentation. Peroxisomes could be useful as target organelles for overexpression of foreign toxic proteins.

**Keywords:** peroxisomal enzymes; peroxins; peroxisome targeting; peroxisome propagation; pexophagy; xylose alcoholic fermentation

## OCCURRENCE AND GENERAL PROPERTIES OF PEROXISOMES IN DIFFERENT GROUPS OF EUKARYOTES

Peroxisomes are DNA-free organelles present in practically all eukaryotic cells. The only known exceptions are the protists *Giardia* and *Entamoeba*, and the fungi *Microsporidia*, which also do not contain mitochondria, and the mitochondria-containing protists belonging to *Apicomplexa* (Cavalier-Smith 1987; Schlüter

et al. 2006; Gabaldón 2010). Peroxisomes could be defined as organelles that contain hydrogen peroxide-generating oxidases and the hydrogen peroxide-detoxifying enzyme catalase. Fatty acid  $\beta$ -oxidation is an important functional characteristic of most eukaryotic peroxisomes from yeast to humans. In animals, peroxisomes are additionally involved in oxidative degradation of long-chain fatty acids, purines, certain amino acids and pipercolinic acid, and in the synthesis of cholesterol, bile acids and ether lipids such as plasmalogens (Olivier and

Krisans 2000; Schrader and Fahimi 2008; Schrader et al. 2013; Faust and Kovacs 2014). Plant peroxisomes are classified into three groups: glyoxysomes, leaf peroxisomes and unspecialized peroxisomes. They all contain catalase; however, they differ strikingly in other features. Glyoxysomes are involved predominantly in the glyoxylate cycle and fatty acid  $\beta$ -oxidation, while leaf peroxisomes play a role in metabolizing glycolic acid. The glyoxylic acid cycle is also localized in yeast peroxisomes. There are ~50 proteins in animal and fungal peroxisomes, and ~100 proteins in plant peroxisomes (Michels et al. 2005). In *Saccharomyces cerevisiae*, there are at least 66 peroxisomal proteins (Kohlwein, Veenhuis and van der Klei 2013). Proteomic and genetic studies continuously reveal new functions for peroxisomes. In some mycelial fungi, there are specialized peroxisomes known as Woronin bodies derived by budding from common peroxisomes and used to plug septal pores in the hyphae during injury (Schrader and Fahimi 2008). Several reactions of penicillin biosynthesis in fungi are localized in peroxisomes (Bartoszewska et al. 2011). In plants and mycelial fungi, one reaction of biotin biosynthesis is located in peroxisomes (Magliano et al. 2011; Tanabe et al. 2011) and it could be hypothesized that the same is true for biotin-prototrophic yeasts (Maruyama and Kitamoto 2013). In some parasitic protists (*Kinetoplastida*), peroxisomes contain the main reactions of glycolysis and are known as glycosomes (Moyersoen et al. 2004). A deficiency in peroxisomes leads to incurable human diseases, such as Zellweger syndrome. Cells from patients with this syndrome were found to lack normal peroxisomes and contain only their rudiments devoid of several matrix proteins (Wanders and Waterham 2006). Typically, peroxisomes are quite small organelles, between 0.1 and 0.2  $\mu\text{m}$  in size and surrounded by a single membrane; however, in methylotrophic yeasts, their size could be much larger (up to 1.5  $\mu\text{m}$ ; see Fig. 1) (Michels et al. 2005; van der Klei et al. 2006; Nagotu, Veenhuis and van der Klei 2010).

## ROLE OF PEROXISOMES IN METABOLISM OF THE YEAST CELL

Biogenesis and degradation of peroxisomes and the role of this organelle in metabolism have been studied in many yeast species. The most popular species are baker's yeast *S. cerevisiae*, methylotrophic yeasts (*Pichia pastoris* and *Hansenula polymorpha*) and *Yarrowia lipolytica*. Methylotrophic yeasts are very convenient model organisms as they allow easy, fast and effective induction of massive proliferation and degradation of peroxisomes (van der Klei et al. 2006). It is interesting to note that the yeast peroxisome is the densest organelle with the highest protein concentrations among all organelles. The high protein concentration in these organelles often results in the formation of protein crystalloids in the peroxisomal matrix of methylotrophic yeasts, but not in *S. cerevisiae* (Kohlwein, Veenhuis and van der Klei 2013).

In yeasts, peroxisomes are involved in numerous metabolic reactions. Similarly to other organisms, yeast peroxisomes contain  $\text{H}_2\text{O}_2$ -producing oxidases (mostly containing FAD as coenzyme) and catalase that degrades hydrogen peroxide. It is assumed that in yeast, the fatty acid  $\beta$ -oxidation pathway and glyoxylic acid cycle reside in peroxisomes. Peroxisomes contain four main enzymes of  $\beta$ -oxidation (medium chain fatty acid CoA activation, oxidation, hydratation/dehydrogenation and thiolactyl cleavage) as well as auxiliary peroxisomal enzymes involved in oxidation of odd-numbered and unsaturated fatty acids (van Roermund et al. 2003). The localization of gly-

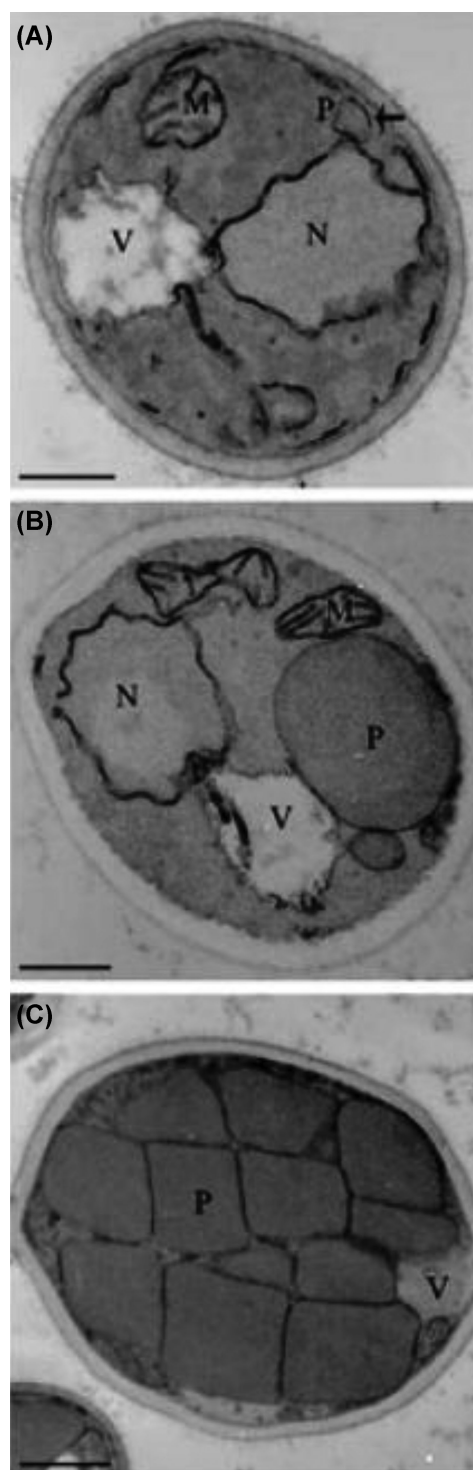

**Figure 1.** Peroxisomes in the cells of the methylotrophic yeast *Hansenula polymorpha* (Nagotu, Veenhuis and van der Klei 2010). (A) A cell grown in glucose medium (a small peroxisome is present). (B) A cell after shifting from glucose medium to methanol (the peroxisome has grown to a large size). (C) Cells after prolonged cultivation in methanol medium (massive proliferation of peroxisomes occurs).

oxylic acid cycle enzymes varies in different yeasts. For example, in *S. cerevisiae*, isocitrate lyase is a cytosolic enzyme, whereas in most other species this enzyme is localized in peroxisomes (Kunze et al. 2006). Recent findings demonstrate that

some yeast species show dual localization (in the cytosol and peroxisomes) of the enzymes of the oxidative part of the pentose phosphate pathway, malate dehydrogenase and glycolysis (Freitag, Ast and Bölker 2012; Kabran et al. 2012; Strijbis et al. 2012). Such dual localization occurs due to alternative splicing of yeast introns, ribosomal read-through of stop codons or low-efficiency peroxisome targeting signals. Defects in peroxisome biogenesis lead to defects in utilization of the corresponding carbon sources, suggesting the importance of peroxisomal localization of the above-mentioned enzymes which previously were thought to be localized only in the cytosol (Idnurm et al. 2007; Stehlik et al. 2014). Most yeast catalases are localized in peroxisomes, and many species contain only peroxisomal catalases, although some others, e.g. *S. cerevisiae*, also possess cytosolic catalase (Jamieson 1998). In addition to catalase, yeast peroxisomes also contain another enzyme involved in detoxification of hydrogen peroxide, glutathione peroxidase, also known as Pmp20 protein (Horiguchi et al. 2001; van der Klei et al. 2006; Ohdate and Inoue 2012). Yeast peroxisomes also contain glutathione transferases, involved in reduction of disulfide bridges of oxidized proteins (Barreto et al. 2006). Enzymes involved in catabolism of unusual carbon and nitrogen sources (methanol, *n*-alkanes, purines, *D*-amino acids, methylamine, ethylamine, pipercolonic acid, sarcosine, glycolate, spermidine, etc.), as well as in lysine biosynthesis are also found in yeast peroxisomes (Breitling et al. 2002; Aksam et al. 2009; Sibirny 2012). Substrates of catabolic enzymes localized in peroxisomes often act as peroxisome proliferators by inducing peroxisome fission and increasing in size. Peroxisomes also contain two phosphatases, Npy1 and Pcd1, involved in metabolism of derivatives of the coenzymes NAD and CoA (Cartwright et al. 2000; Abdelraheim et al. 2001). In certain cases, peroxisomes can occupy a substantial part or even most of the cell volume, as can be observed in the methylotrophic yeast *H. polymorpha* during growth on methanol (Fig. 1) (Veenhuis, Van Dijken and Harder 1983; van der Klei et al. 2006; Nagotu, Veenhuis and van der Klei 2010).

Absence of peroxisomes leads to mislocalization of matrix peroxisomal enzymes in the cytosol. This has no impact on yeast growth on methylated amines or ethanol which are normally metabolized in peroxisomes (e.g. in *S. cerevisiae*; see Kunze et al. 2006). However, such mutants (including those of *S. cerevisiae*) are unable to grow on fatty acids or methanol. The reasons for this are not clear. Possibly, the cells are poisoned by H<sub>2</sub>O<sub>2</sub> accumulated in the cytosol of peroxisome-deficient mutants (van der Klei, Harder and Veenhuis 1991). It is known that only some enzymes of the initial steps of methanol metabolism are localized in peroxisomes: alcohol oxidase, catalase and dihydroxyacetone synthase, whereas the others (formaldehyde dehydrogenase, S-formyl glutathione hydrolase, formate dehydrogenase, dihydroxyacetone kinase and other enzymes of the xylulose monophosphate pathway of formaldehyde assimilation) are located in the cytosol. It is interesting to note that dihydroxyacetone kinase of *P. pastoris* possesses peroxisome targeting signal 1 (PTS1; see below) despite the protein being localized in the cytosol (Lüers et al. 1998). It is thought that dihydroxyacetone kinase is folded into a conformation that makes its C-terminus inaccessible to the PTS1 receptor. Recently, it was suggested that *P. pastoris* contains all enzymes of the xylulose monophosphate cycle located in peroxisomes, so this species possesses isozymes of the non-oxidative part of the pentose phosphate pathway located in both the cytosol and peroxisomes (Rußmayer et al. 2015). It was also shown, contrary to previous findings (Lüers et al. 1998), that dihydroxyacetone kinase in *P. pastoris* is localized in both the cytosol and peroxisomes

(Rußmayer et al. 2015). It was, however, definitely shown that elimination of the PTS1 signal in dihydroxyacetone kinase protein does not lead to any defects in methanol utilization, suggesting that this enzyme is indeed functionally active when located in the cytosol (Lüers et al. 1998). Also, it has to be pointed out that the functional role of peroxisomal enzymes of the xylulose monophosphate pathway remains to be elucidated. In *H. polymorpha*, mutants with knock out of peroxisomal transaldolase (*tal2Δ*) normally grow on methanol, in contrast to the mutants defective in cytosolic transaldolase (*tal1Δ*), which are totally defective in growth on this alcohol. Thus, the peroxisomal transaldolase at least is redundant for methanol utilization, whereas the cytosolic isoform is essential for this process (Kurylenko et al. 2016). In other words, proof of peroxisomal localization of the enzymes of the pentose phosphate pathway does not mean that they are involved in methanol metabolism *in vivo*.

## PEROXINS AND PEROXISOME BIOGENESIS

Yeasts appear to be a convenient model to study the mechanisms of peroxisome biogenesis because cell transfer from a glucose-containing medium into a medium containing a peroxisome proliferator (oleate and/or methanol are mostly used) induces synthesis of peroxisomal enzymes and the growth and division of peroxisomes. Peroxisomes may occupy up to 80% of the cell volume in cells growing in the presence of methanol under certain conditions (Veenhuis, Van Dijken and Harder 1983; Nagotu, Veenhuis and van der Klei 2010). Peroxisomal biogenesis relies on the endoplasmic reticulum (ER) which provides lipids and peroxisomal membrane proteins (PMPs), and on the cytosol which supplies the matrix proteins. Currently, 34 genes whose products are specifically involved in peroxisome biogenesis have been identified (Supplementary Table S1). These are so-called PEX genes, whereas their products are known as Pex proteins or peroxins. Most of them have been identified on *S. cerevisiae*, although some peroxins are absent in this organism. Soluble peroxisomal matrix proteins (e.g. enzymes of fatty acid  $\beta$ -oxidation, alcohol oxidase, catalase, etc.) are not called peroxins. The majority of known PEX genes were identified by using yeast mutants defective in peroxisome biogenesis (Erdmann et al. 1989; Liu et al. 1992; Elgersma et al. 1993; Johnson et al. 1999), and recently further peroxins were identified by organelle proteomics (Pex11 and Pex13) or transcriptome analysis (Pex25) (Kohlwein, Veenhuis and van der Klei 2013). The mechanisms of action of peroxins were determined via phenotypic analysis of the mutants, the use of the yeast two-hybrid system and the development of methods for biochemical analyses of the proteins. The majority of peroxins are involved in the import of peroxisomal matrix proteins (Heiland and Erdmann 2005; Ma and Subramani 2009; Yuan, Veenhuis and van der Klei 2016). Major groups of peroxins include receptors Pex5 and Pex7 for peroxisomal matrix proteins containing PTS1 and PTS2 targeting sequences, respectively; peroxisome-associated docking proteins (Pex13) for Pex5; and another docking protein, Pex14, which binds to both Pex5 and Pex7 receptors. Three known as RING peroxins (Pex2, Pex10 and Pex12) are integral membrane proteins, possess zinc fingers and act as E3 ligases during receptor recycling. Two proteins, Pex1 and Pex6, are ATPases of the AAA family. Pex4 belongs to the ubiquitin-conjugating enzymes; Pex11 is involved in peroxisome proliferation; Pex8 matrix protein contains both targeting sequences (PTS1 and PTS2) and forms a multiprotein complex involved

in peroxisomal protein import; two proteins, Pex16 and Pex17, are associated with the outer membrane surface and are involved in peroxisomal trafficking of PMPs via the ER most probably involved in the import of several matrix proteins; finally, several peroxins act as membrane proteins and are possibly involved in protein translocation across the membrane. Several peroxins are species specific. For instance, Pex16 and Pex33 are absent from methylotrophic yeasts and are only found in other ascomycetes (*S. cerevisiae*, *Y. lipolytica* and *Neurospora crassa*). Peroxin Pex26 is present only in mammals (Ma and Subramani 2009; Sibirny 2012; Aranovich et al. 2014; Kim and Hettema 2015).

All peroxisomal matrix proteins are translated on free polyribosomes in the cytosol and then post-translationally imported into pre-existing peroxisomes (Lazarow and Fujiki 1985). The term 'peroxisome biogenesis' implies mostly the processes by which the peroxisomal matrix and membrane proteins are assembled into the organelle, as well as those involved in the control of peroxisome size, volume and number (Ma and Subramani 2009). There are two types of PTS for peroxisomal soluble proteins, PTS1 and PTS2. PTS1, which is located at the C-terminus of proteins, is used by the majority of peroxisomal matrix proteins. Apart from some variants, the evolutionarily conserved sequence shared by PST1 is (S/A/C)-(K/R/H)-(L/M) (Gould et al. 1989; Lametschwandner et al. 1998). A small group of matrix proteins are targeted to the peroxisome by PTS2 which is a conserved nonapeptide with the consensus sequence (R/K)-(L/V/I)-X5-(H/Q)-(L/A) (where X means any amino acid) and is located near the N-terminus (Rachubinski and Subramani 1995). Even more rarely proteins possess both PTS1 and PTS2 simultaneously, e.g. Pex8 of *P. pastoris* (Zhang, Léon and Subramani 2006). The PTSs for matrix proteins are recognized by specific cytosolic receptors which escort the cargos to the peroxisome membrane (Léon, Goodman and Subramani 2006a). Regions of the Pex5 receptor responsible for binding PTS1-containing cargos

have been identified (Hagen et al. 2015). Subsequently, the matrix proteins and their receptors enter the peroxisome matrix (Nair, Purdue and Lazarow 2004; Leon et al. 2006b) where cargos are released, and the cargo-free receptors are first exported to the peroxisome membrane via a retro-translocation step, and then the PTS receptors are recycled (Ma and Subramani 2009). The sequence of events during matrix protein import is as follows: (i) cargo recognition and binding; (ii) docking of the receptor–cargo complex at the peroxisome membrane; (iii) cargo translocation and release; (iv) translocation of free receptors to the peroxisomal membrane; and (v) recycling of free receptors from peroxisome membranes to the cytosol (Ma and Subramani 2009). PTS1 of delivered cargo protein is recognized by the specific receptor cytosolic protein Pex5 which interacts with the cargo via tetrapeptide repeats located at the C-terminus of Pex5 (Stanley et al. 2006). Cargo proteins which use PTS2 employ the protein Pex7 as receptor (Marzioch et al. 1994). Some PTS2 proteins interact with the Pex20 co-receptor (Otzen et al. 2005). Finally, there are data on matrix proteins that cross the peroxisomal membrane but do not contain PTS1 or PTS2 signals (Thoms et al. 2008, Thoms 2015). The PTS receptor–cargo complex interacts with a peroxisome membrane-associated docking complex comprised of the conserved proteins Pex13, Pex14 and, sometimes, Pex17 (Agne et al. 2003). It was believed that components of the docking and RING subcomplexes, as well as the proteins that bridge these subcomplexes (Pex3 and Pex8), formed an importomer, a term assumed to be synonymous with the translocon (Agne et al. 2003; Rayapuram and Subramani 2006). In the case of translocation of Pex8, peroxisomal membrane protein Pex14 could be the only protein required for cargo translocation (Ma and Subramani 2009). The mechanisms of cargo release remain unknown. Export of cargo-free receptors from inside peroxisomes apparently involves RING subcomplex proteins including Pex2, Pex10 and Pex12 (Agne et al. 2003; Leon et al. 2006b). The sequence of events during matrix protein import (Fig. 2) is as follows: the

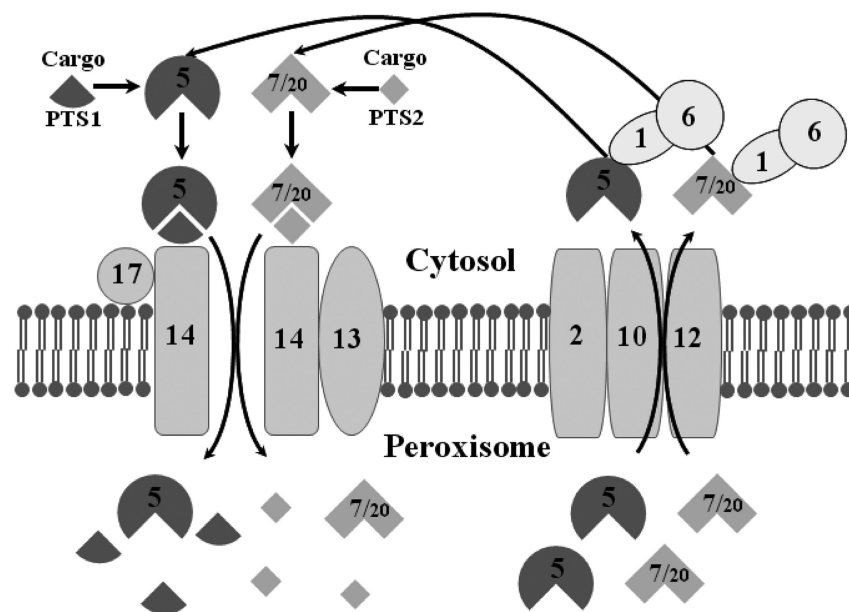

**Figure 2.** The scheme of the import of peroxisome matrix proteins. A cargo protein to be imported binds to a soluble receptor (Pex5 for PTS1-containing proteins or Pex7 and Pex20 for PTS2-containing proteins). The receptor–cargo protein complex binds to the so-called docking complex on the peroxisomal membrane consisting of proteins Pex13, Pex14 and Pex17, and the receptor–cargo protein complex is transferred into the peroxisomal matrix. The receptor–cargo protein complex dissociates in the peroxisomal matrix to release the cargo protein, whereas the receptor is exported onto the peroxisomal membrane with involvement of the proteins Pex2, Pex10 and Pex12. The receptors could be utilized in the next import round. The corresponding peroxins are indicated by their ordinal numbers.

peroxins Pex1 and Pex6 form heterohexamers and enable matrix protein translocation through the central channel of the Pex1/Pex6 oligomer by ATP hydrolysis (Ciniawsky et al. 2015; Gardner et al. 2015; Knoops et al. 2015). The dynein light chain protein Dyn2 is also implicated in matrix peroxisome targeting and biogenesis (Chang et al. 2013). Some peroxisomal matrix proteins do not possess PTSs and are transported due to binding to a protein with a PTS (Kumar et al. 2016).

Targeting of membrane peroxisomal proteins is tightly connected to the question of the origin of peroxisomes. It is interesting to note that mutants *pex3*, *pex16* and *pex19* that completely lack peroxisomal membrane structures produce normal peroxisomes upon rescue with wild alleles of the mutated PEX genes (though *pex3* mutants of *H. polymorpha* contain pre-peroxisomal vesicles) (Höhfeld, Veenhuis and Kunau 1991; Hoepfner et al. 2005; Knoops et al. 2014). It was hypothesized that newly formed peroxisomes originate from the ER (Tam et al. 2005). The details of membrane peroxin targeting remain unclear. It should be noted that there are two classes of membrane peroxins, those with tail anchor sequences (such as Pex15) and the predominant ones with one or several transmembrane domains (such as Pex2). Available data suggest that at least two routes exist by which PMPs can reach peroxisomes: one direct route and one via the ER (Kim and Hettema 2015). Most membrane peroxins are imported post-translationally from the cytosol. Many of these proteins possess a membrane PTS (mPTS) that consists of a cluster of positively charged residues or a mixture of positively charged and hydrophobic residues flanked by one or two transmembrane segments that are recognized and bound by Pex19 (Baerends et al. 2000; Wang, Unruh and Goodman 2001). One of the models for direct post-translational targeting of peroxisomal membrane proteins to peroxisomes proposes that Pex19 acts as a soluble recycling receptor/chaperone that picks up newly synthesized proteins in the cytosol and subsequently docks on Pex3 in the peroxisomal membrane (Muntau et al. 2003). The pathway of membrane peroxins through the ER was first described in *Y. lipolytica* (Titorenko, Ogrydziak and Rachubinski 1997). It is assumed that Pex3, Pex16 and Pex19 are involved in the early steps of the ER-peroxisome pathway and are the earliest membrane peroxins that are associated with the ER (Sacksteder et al. 2000). In *Y. lipolytica*, the newly synthesized membrane peroxin Pex16 is incorporated into the ER and provides a scaffold for binding of other peroxins (such as Pex3 and Pmp34) from the cytoplasm (Titorenko and Rachubinsky 1998). The process is somewhat different in yeasts lacking a PEX16 homolog, e.g. in *S. cerevisiae*. For instance, Pex3 is initially targeted into the ER and then segregated into a pre-peroxisomal entity together with the Pex19 membrane peroxin, which acts as a receptor and, by interacting with Pex3, ensures the import of other membrane peroxins into the peroxisome (Platta and Erdmann 2007). Recently, the existence of two distinct pre-peroxisomal vesicles that arise from the ER has been found. Each type of vesicle carries part of the peroxisomal translocon complex. Their fusion leads to assembly of the full peroxisomal translocon and subsequent uptake of enzymes from the cytosol (van der Zand et al. 2012). The exact functions of the Pex1–Pex6 peroxin complex are not known. Possibly they are involved in the fusion of the above-mentioned pre-peroxisomal vesicles (van der Zand et al. 2012) or in recycling of the Pex5 receptor (Erdmann 2016).

It is assumed that lipids of the ER and certain membrane proteins are delivered into peroxisomes via a vesicular transport pathway, although current data suggest a direct transfer of phospholipids from the ER into peroxisomes without vesicular transport (Raychaudhuri and Prinz 2008).

Biogenesis of yeast peroxisomes depends not only on peroxins but also on specific transcription factors identified in methylotrophic yeasts *H. polymorpha* (Leao-Helder et al. 2003), *P. pastoris* (Lin-Cereginio et al. 2006) and *Candida boidinii* (Sasano et al. 2008). Methanol weakly induced peroxin PEX genes (up to 5-fold) in *H. polymorpha*, though it strongly induced genes of peroxisomal matrix proteins such as enzymes of fatty acid  $\beta$ -oxidation and the glyoxylic acid cycle (van Zutphen et al. 2010). Methanol most effectively induced expression of the MPP1 gene coding for a transcription activator of peroxisome biogenesis (394-fold). Mpp1 protein belongs to the family of transcription regulators containing so-called zinc fingers [Zn(II)<sub>2</sub>Cys<sub>6</sub>]. Mutant *mpp1* was unable to utilize methanol as the sole carbon and energy source and was characterized by a very low level of peroxisomal proteins including those of methanol catabolism, and, one of them, dihydroxyacetone synthase, was totally absent. Methanol did not induce peroxisome proliferation in *mpp1* cells which contained only one peroxisome. Moreover this single peroxisome did not undergo autophagic degradation after a shift to glucose medium (Leao-Helder et al. 2003). The mechanism of transcription activation by Mpp1 protein remains unknown. The MPP1 gene of *H. polymorpha* resembles transcription factor genes of other methylotrophic yeasts: MXR1 of *P. pastoris* (Lin-Cereginio et al. 2006) and TRM1 and TRM2 of *C. boidinii* (Sasano et al. 2008; 2010), which appear to be essential for peroxisome biogenesis. Repression of peroxisome biogenesis by glucose and glycerol in *P. pastoris* is controlled by the specific transcriptional repressor Nrg1 (Wang et al. 2016).

## METABOLITE TARGETING TO PEROXISOMES

Some preliminary information is available on mechanisms of metabolite transport through the peroxisomal membrane. In contrast to the inner mitochondrial membrane, which contains nearly 50 membrane transport proteins, the peroxisomal membrane contains no more than 10 proteins and only a few of them fulfill transport functions (Antononkov and Hiltunen 2012). In contrast to, for example, lysosomal enzymes, the enzymes in peroxisomes do not show latency, i.e. they do not increase their activity after disruption of the organelle membrane by physical treatment or detergents. This was later confirmed by detection of the activity of peroxisomal enzymes (urate oxidase, L- $\alpha$ -hydroxyacid oxidase and D-amino acid oxidase) in digitonin-permeabilized rat hepatocytes (Verleur and Wanders 1993). The results were interpreted as an indication that the peroxisomal membrane is open to solutes and contains pore-forming proteins. However, several lines of evidence indicate that the peroxisomal membrane is impermeable to solutes, and the results of some *in vitro* experiments may represent artifacts caused by disruption of peroxisomes during preparation. Furthermore, a peroxisomal membrane channel protein (pore) has been described; it is formed by Pxm2 protein and is responsible for penetration of low molecular weight metabolites, e.g. glyoxylic acid cycle metabolites (Antononkov et al. 2009; Grunau et al. 2009; Antononkov and Hiltunen 2012). It is interesting that the peroxin Pex11 known to be involved in peroxisome proliferation (Thoms and Erdmann 2005) also forms a pore in the peroxisomal membrane, thus acting as a non-specific transient receptor potential cation-selective channel (TRPM) (Mindthoff et al. 2016). It was found that the membrane of yeast peroxisomes is impermeable to NAD/H and acetyl-CoA under *in vivo* conditions (van Roermund et al. 1995; Kal et al. 1999). Substrates for  $\beta$ -oxidation enter peroxisomes via ATP-binding cassette (ABC) transporters of subfamily D and are activated by specific acyl-CoA

synthetases for further metabolism (Baker et al. 2015). Finally, an ATP transporter, which belongs to the superfamily of mitochondrial inner membrane solute carriers, was detected in the membrane of peroxisomes from different sources (Palmieri et al. 2001; Arai et al. 2008).

## PEROXISOME DIVISION AND INHERITANCE

We discuss here current knowledge on peroxisome division, movement to the bud and retention in the mother cell. Peroxisomes divide during the cell cycle for maintenance (constitutive division); in addition, they divide during peroxisome proliferation induced by fatty acids, methanol, purines, D-amino acids or other peroxisome proliferators (regulated division). Though normally peroxisomes are formed by fission of previous peroxisomes, in the case of introduction of *PEX3* or *PEX19* genes to the corresponding knock out mutants, peroxisomes are formed *de novo* from membrane vesicles of ER origin (Veenhuis and van der Klei 2014). Peroxisome fission is controlled by Pex11 which is responsible for organelle elongation. Knock out of *PEX11* led to a small number of enlarged peroxisomes, whereas its overexpression resulted in numerous small peroxisomes in the cell (Opaliński et al. 2011). Regulation of Pex11 involvement in peroxisome fission could be achieved by protein phosphorylation (Knoblach and Rachubinski 2010). Peroxisomes are formed by fission of existing peroxisomes due to activities of the dynamin-related proteins with GTPase activities, Dnm1 and Vps1. Cells of the double *dnm1 vps1* mutant contain only one large peroxisome, and its fission is totally blocked (Hoepfner et al. 2001; Motley and Hettema 2007; Nagotu et al. 2008). Dnm1 is essential for peroxisome fission under induction of peroxisome proliferation, whereas Vps1 functions under glucose-repressing conditions (Hoepfner et al. 2001; Kuravi et al. 2006). The role of the tail-anchored protein Fis1 in Dnm1 recruitment to peroxisomes was established (Motley and Hettema 2007; Motley, Ward and Hettema 2008). The role of peroxins other than Pex11 in peroxisome fission was found, namely of peroxins of Pex11 family members (Pex25, Pex27 and Pex34) (Tower et al. 2011) and of Pex23 and its family members (Pex24, Pex28, Pex29, Pex30, Pex31 and Pex32) (Kiel, Veenhuis and van der Klei 2006).

During yeast cell budding, organelles, including peroxisomes, are duplicated and distributed between the mother and daughter cells, which is powered by the cytoskeleton. The actin-based movement of organelles is catalyzed by the class V myosins, mainly Myo2 (Knoblach and Rachubinski 2015). These molecular motors contain N-terminal domains that are required for binding to F-actin and generating force through the hydrolysis of ATP, while their C-termini form globular tails that attach to cargos by binding to organelle-specific adaptor molecules (Sellers and Veigel 2006). Myosin Myo2 is responsible for the movement of peroxisomes as well as secretory vesicles, Golgi, mitochondria and vacuoles (Fagarasanu et al. 2010). Lipid droplets also segregate to buds in a Myo2-dependent manner (Knoblach and Rachubinski 2015). Peroxisomes attach to Myo2 through inheritance of peroxisome protein 2 (Inp2), a peroxisomal integral membrane protein. Peroxisomes are transferred from the mother cell to buds in a highly ordered vectorial process (Fagarasanu et al. 2006). Moreover, Myo2 moves different organelles at distinct times in the cell cycle; for example, movement of peroxisomes always precedes movement of mitochondria (Knoblach et al. 2013). Mutagenesis of conserved surface amino acids in the Myo2 tail identified sequences required for its binding specifically to vacuoles, mitochondria, secretory vesi-

cles and peroxisomes (Pashkova et al. 2006; Altmann et al. 2008; Fagarasanu et al. 2009). Mutants in which Myo2 can no longer attach to the peroxisomal surface do not exhibit bud-directed polarization of peroxisomes (Motley and Hettema 2007), and peroxisomes remain associated with the same cell over many generations because they are not released from their cortical tethers (Knoblach et al. 2013). These peroxisomes then also accumulate Inp2 and cannot be transported to the bud (Fagarasanu et al. 2009; Knoblach et al. 2013). Inp2 is the adaptor protein of Myo2 that forms a transport complex with peroxisomes. The level of Inp2 changes during the cell cycle; it reaches maximal concentration during peroxisome transfer to the bud and is degraded after their delivery (Fagarasanu et al. 2006; Peng and Weisman 2008). Inp2 contains several recognition sites for the cyclin-dependent kinase Cdk1 and is phosphorylated during the cell cycle (Peng and Weisman 2008; Fagarasanu et al. 2009). Peroxisome inheritance is uncoupled from the cell cycle in the Myo2 mutants defective in Inp2 binding; the levels of Inp2 are increased, implying that the amount of Inp2 is not controlled by the cell cycle but rather by the distribution of peroxisomes in the cell. Thus, peroxisome delivery between mother and daughter cells is precisely regulated.

It is important for at least a part of organelles, including peroxisomes, to remain in the mother cell during division. Peroxisome retention depends on their anchoring at the cell periphery (Fagarasanu et al. 2005). Organelles, including peroxisomes, are retained in the cell by the formation of membrane contact sites, or tethers, with other organelles. Organelle tethers assemble at discrete foci where membranes from two organelles come into close contact but do not fuse. Tethering proteins are either integral to the membrane of one of the compartments or can be classified as membrane-associated proteins that link the integral membrane proteins to each other. The structure of the tether that connects peroxisomes has recently been resolved. It consists of two proteins, Inp1 and the peroxin Pex3 (Knoblach et al. 2013). Cells lacking Inp1 contain only mobile peroxisomes that are eventually driven to the bud by the Inp2–Myo2 transport complex, whereas cells overproducing Inp1 maintain all of their peroxisomes in fixed cortical positions in the mother cell and do not transfer any peroxisomes to the daughter cell (Fagarasanu et al. 2005). Inp1 is required for attaching peroxisomes to Pex3, which is essential for peroxisome biogenesis and is integral to both the ER and the peroxisomal membranes (Hoepfner et al. 2005; Munck et al. 2009; Thoms et al. 2012). Inp1 contains at least two binding sites for Pex3 and acts as a molecular hinge by bridging ER-bound Pex3 and peroxisomal Pex3 into an ER-peroxisome tethering complex (Knoblach et al. 2013). Mutants defective in peroxisome division contain a single giant peroxisome (Hoepfner et al. 2001; Kuravi et al. 2006). Inp1 and Inp2 are present on this enlarged peroxisome but are polarized to opposite ends. Inp2 is enriched on the part of the peroxisome that protrudes into the bud, whereas Inp1 is found on the part that is retained in the mother cell (Knoblach et al. 2013). Cells lacking Inp1 have fewer and larger peroxisomes than wild-type cells, and cells overexpressing Inp1 contain numerous small peroxisomes. Inp1 physically interacts with peroxins Pex25, Pex30 and Vps1, proteins that modulate the elongation and scission steps of peroxisome division (Fagarasanu et al. 2005; Schrader, Bonekamp and Islinger 2012).

Substantial information is available on the interaction of the ER and peroxisomes, including PMP targeting and peroxisome origin from the ER (David et al. 2013; Dimitrov, Lam and Schekman 2013). Interaction of the peroxisome with vacuoles has been well investigated; it occurs during autophagic peroxisome

degradation. However, there is a little knowledge about the interaction or cross-talk between peroxisomes and mitochondria. Recently it has been found that peroxisomes establish physical contacts with mitochondria as they are localized to specific mitochondrial subdomains such as mitochondria–ER junctions and sites of acetyl-CoA synthesis (Cohen et al. 2014). It was recently reported that the membrane peroxin Pex11 physically interacts with mitochondrial Mdm34 and that such an interaction is important for contacts between peroxisomes and mitochondria through the ERMES complex (Mattiazzi Ušaj et al. 2015). Apposed membrane contact sites were also found between peroxisomes and lipid droplets and additionally with mitochondria (Pu et al. 2011; Schrader et al. 2015). These specific molecular interactions suggest involvements of peroxisomes and mitochondria in metabolism of lipid droplets in yeast.

## PEROXISOME AUTOPHAGIC DEGRADATION (PEXOPHAGY)

Studying the mechanisms of autophagic degradation of cytosolic proteins and organelles, including peroxisome (pexophagy), is one of the hot topics of modern cell biology. There are numerous reviews on autophagy and pexophagy (Kiel 2010; Manjithaya et al. 2010; Sibirny 2011; Till et al. 2012; Suzuki 2013, 2014; Oku and Sakai 2016). Autophagy is a conserved mechanism of continuous degradation of proteins and organelles, including peroxisomes, though it is activated during nitrogen starvation. Apparently, it takes place during yeast propagation in any medium, contributing to cellular maintenance, housekeeping or as a turnover mechanism (Aksam et al. 2007; Suzuki 2013). However, usually pexophagy is a highly specific mechanism involved in degradation of excess peroxisomes, which, nevertheless, leaves at least one peroxisome non-degraded. As mentioned previously, yeasts, especially methylotrophic yeasts, are very convenient model systems to study pexophagy. A shift of glucose-grown cells into media with peroxisome proliferators, e.g. oleate and especially methanol, increases the cellular volume of peroxisomes up to 80%. When such cells from methanol or oleate-containing medium are shifted to media with glucose or ethanol, massive degradation of peroxisomes occurs (Sakai et al. 2006; Sibirny 2014).

Most steps are shared between specific pexophagy and general (nonspecific) autophagy. The following proteins are involved (Manjithaya et al. 2010): (i) signaling proteins required for autophagy induction: protein kinase Tor1, protein kinase A, Sch 9, Tap42 and phosphatase type 2A; (ii) packaging proteins or organelles transported for degradation (Atg19, Atg11 and Atg8); (iii) formation of pre-autophagosomal structure (Atg1, Atg11, Atg13, Atg17, Atg29 and Atg31); (iv) vesicle nucleation (Atg6, Atg9 and phosphatidylinositol 3-kinase); (v) vesicle expansion and completion (Atg3-5, Atg6, Atg7, Atg8, Atg10, Atg12, Atg14 and Atg16); (vi) protein retrieval (Atg1, Atg2, Atg18, Atg23 and Atg27); (vii) homotypical fusion of isolation membrane (Tlg2); (viii) transport and heterotypical fusion of autophagosome and vacuoles (v- and t-SNAREs, Ccz1, Mon1 and HOPS complex); and (ix) intravacuolar vesicle degradation (Atg15, proteinase A and proteinase B).

The list of the known AuTophagy-related (Atg) proteins is presented in Supplementary Table S2. Among the 42 currently known Atg proteins, only 17 are necessary for all types of autophagy, whereas the others are specific: either used in special pathways of selective autophagy or representing species-specific modifications. Specific pexophagy pathways utilize several specific proteins, which do not participate in non-specific

autophagy. During pexophagy, the specific pre-autophagosomal structure (PAS) is formed, distinct from PASs produced during other types of selective autophagy. The pexophagy-specific PAS is organized by Atg11, Atg17 and Atg30 (Farré et al. 2008; Nazarko, Farré and Subramani 2009). Studies of pexophagy in the methylotrophic yeast *P. pastoris* revealed two morphologically diverse pexophagy processes, called macropexophagy and micropexophagy (Manjithaya et al. 2010; Farré and Subramani 2004; Tuttle and Dunn 1995; Sakai et al. 2006; Sibirny 2011). During macropexophagy initiated by transferring cells from methanol medium to ethanol medium, individual peroxisomes are gathered in double membrane structures called pexophagosomes that merge with vacuoles, leading to degradation and repeated usage of the pexophagosomal content. During micropexophagy (occurring after transferring methylotrophically grown cells to glucose medium), peroxisome clusters are engulfed by vacuolar-sequestering membranes and a specific micropexophagy apparatus (MIPA) (Mukaiyama et al. 2004), which forms a cap above a cup-shaped vacuolar sequestering membrane surrounding a peroxisome (Farré et al. 2009; Manjithaya et al. 2010) (see Fig. 3). Heterotypical fusion between vacuolar-sequestering membranes and the MIPA transports peroxisomes inside the vacuole for degradation and repeated use of its components. The MIPA and pexophagosomes originate from the PAS. In *H. polymorpha*, nitrogen limitation leads to peroxisome degradation by a mechanism similar to micropexophagy. However, this process occurs due to a non-specific autophagic mechanism, by which cytosolic components are taken up by vacuoles concomitantly with peroxisomes, and was therefore named microautophagy of peroxisomes (Bellu et al. 2001b; van Zutphen, van der Klei and Kiel 2008).

There are several specific proteins involved only in pexophagy and not in the other types of autophagy: Atg24, Atg26, Atg28 and Atg30. In *P. pastoris*, Atg24 localizes to the pexophagosome–vacuole fusion complex during macropexophagy. This protein contains a PtdIns3P-binding module (Ano et al. 2005). A defect in PpAtg24 blocked pexophagy after pexophagosome formation and before fusion to the vacuole. Apparently PpAtg24 is involved in pexophagosome fusion with the vacuole and in micropexophagy. ATG26 encodes an enzyme, sterol glucoside transferase (Oku et al. 2003; Stasyk et al. 2003), which is involved in pexophagy in *P. pastoris* but not in the alkane-utilizing yeast *Y. lipolytica*. It was found that in *P. pastoris*, ATG26 was necessary for pexophagy of large peroxisomes, which accumulated in methanol medium (Nazarko et al. 2007a,b). It was also shown that the *P. pastoris* Atg26 was required for elongation of the PAS into the MIPA during micropexophagy (Yamashita et al. 2006). *Pichia pastoris* ATG28 encodes a pexophagy-specific protein as its deficiency impairs both pexophagic mechanisms (macro- and micropexophagy) and only partially affects the general (non-specific bulk turnover) autophagy induced by nitrogen starvation (Stasyk et al. 2006; Nazarko, Farré and Subramani 2009).

Another pexophagy-specific protein is Atg30, which is involved in pexophagy and not in general autophagy due to interaction with peroxins Pex3 and Pex14. In *P. pastoris*, Atg30 interacts with Pex3 and Pex14 both localized on the peroxisomal membrane (Farré et al. 2008; Burnett et al. 2015). Effective peroxisome homeostasis probably requires their biogenesis and degradation to be co-ordinated. In *H. polymorpha* Pex14, the 64 N-terminal amino acid residues are necessary for pexophagy (Bellu et al. 2001a; van Zutphen, van der Klei and Kiel 2008). Apparently pexophagy is controlled by a receptor protein complex which consists of Pex3 and Pex14 peroxins, Atg30 receptor, Atg11 and

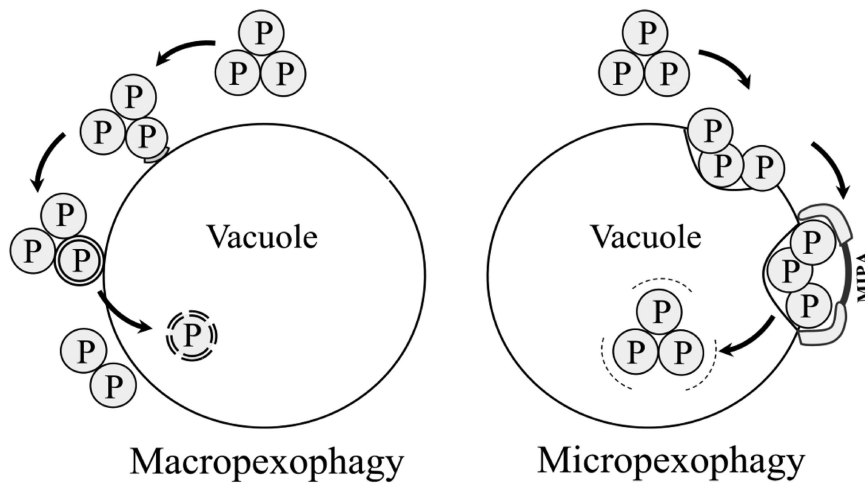

**Figure 3.** Schemes of macropexophagy (left) and micropexophagy (right). The formation of a pexophagosome around a peroxisome (P) is a distinguishing feature of macropexophagy. Micropexophagy includes a peroxisome (P) being engulfed by vacuolar membrane invagination with formation of a cup-shaped micropexophagy apparatus (MIPA).

Atg17 scaffolds, phagophore protein Atg8 and Atg37 involved in the assembly of this complex (Nazarko 2014). In *P. pastoris*, a gene designated PDG1 (Peroxisome DeGradation) was identified, encoding the membrane protein whose mutations led to disturbances in peroxisome degradation (Dunn et al. 2005). In *H. polymorpha*, the transcriptional repressor Tup1 was shown to be essential for macropexophagy (Leão-Helder et al. 2004). Defects in orthologs of presumed repressors involved in glucose catabolite repression, MIG1 and MIG2, also showed impairment in pexophagy (Stasyk et al. 2007). As mutants defective in MIG1 and MIG2 were not affected in glucose catabolite repression, one may assume that the functions of their products are different between baker's and methylotrophic yeasts. Over the last years, genes have been identified that are specifically involved in macro- and micropexophagy. The ATG25 gene in *H. polymorpha* is specifically involved in macropexophagy. It codes for a coiled-coil protein that acts as a selectivity factor during macropexophagy (Monastyrska et al. 2005). This protein is located in the pexophagosomes and is transported there via the PAS. Atg25 is involved in the completion of sequestration of peroxisomes or in the fusion of pexophagosomes with the vacuolar membrane (Sakai et al. 2006). For the latter process, the SNARE Vam7 and the GTPase Ypt7 are also essential in *H. polymorpha* (Stevens et al. 2005).

The gene PFK1 codes for phosphofructokinase 1  $\alpha$ -subunit, which is required for peroxisome engulfment by vacuoles after transferring *P. pastoris* cells from methanol to glucose medium (Yuan et al. 1997). The participation of phosphofructokinase 1  $\alpha$ -subunit in micropexophagy does not depend on its ability to phosphorylate fructose-6-phosphate since a catalytically inactive form of this enzyme allows for normal pexophagy. Moreover, the VAC8 gene (VACuole related) was identified that specifically participates in micro- but not macropexophagy (Fry et al. 2006; Nazarko et al. 2007a). In the mutant cells, the vacuolar sequestering membrane is not formed during micropexophagy. Vac8 probably participates in early (formation of sequestering membrane) and late (membrane fusion after formation of the MIPA) micropexophagy stages. Mutations in the genes PpGcn1, PpGcn2, PpGcn3 or PpGcn4 involved in general amino acid control specifically inhibit micropexophagy after incorporation of the peroxisomes into the vacuole (Mukaiyama et al. 2002; Sakai et al. 2006), but the detailed functions of the Gcn proteins are

not clear. The micropexophagy-specific protein Atg35, the first autophagy protein with nuclear localization, was identified in *P. pastoris* (Nazarko et al. 2011). Characterization of *P. pastoris atg35* mutants showed that macropexophagy was normal, whereas micropexophagy was impaired. It was found that Atg35 is necessary only for micropexophagy at the stage of MIPA formation (Nazarko et al. 2011). It is interesting that overexpression of ATG35, as well as deletion of this gene, both inhibit micropexophagy. Atg35 contains a putative nuclear localization signal. Atg35 localization on single dot-like structures of the nuclear membrane in glucose medium was found to be dependent on Atg17 and is significant for the micropexophagy process. Atg28 is known to interact with Atg17 (Nazarko et al. 2007a) and Atg35 (Nazarko et al. 2011).

We have limited knowledge on glucose and ethanol signaling involved in pexophagy initiation. In *P. pastoris*, GSS1 coding for a glucose sensor was found to be important for pexophagy (Polupanov, Nazarko and Sibirny 2012; Polupanov and Sibirny 2014). Orthologs of GPCR genes GPR1 and GPA2 in *P. pastoris* are not involved in pexophagy, in contrast to the case in *S. cerevisiae* (Nazarko et al. 2008; Nazarko, Thevelein and Sibirny 2008). MAPK Slt2 protein is involved in glucose signaling during pexophagy in *P. pastoris* (Manjithaya et al. 2010).

## PERSPECTIVES OF BIOTECHNOLOGICAL APPLICATIONS OF PEROXISOMES

Peroxisomes have been proposed to be used for expression of heterologous proteins. The advantage of storage of heterologous proteins in the peroxisomal matrix is the absence of protein-modifying enzymes in this cell compartment (e.g. mediating phosphorylation, glycosylation or proteolysis), which may give rise to undesired modifications upon production in the cytosol or during passage in the ER. Peroxisome could be an especially promising compartment for expression and storage of toxic proteins, as the peroxisomal membrane prevents their leakage out of the organelle. This is, however, only speculation, since reviews about the expression of heterologous proteins in *H. polymorpha* (Faber et al. 1996; van Dijk et al. 2000) and *P. pastoris* (Cereghino and Cregg 2000) do not give corresponding examples of the expression of heterologous industrial proteins in



peroxisomes. At least in one case, the presence of peroxisomes decreased the expression of a heterologous protein; shown for hepatitis B surface antigen in *H. polymorpha* (Krasovska, Stasyk and Sibirny 2013). There is also a possibility of locating several foreign enzymes to peroxisomes, thus creating a new metabolic pathway. This is a quite interesting and promising idea; however, transport of substrates of the pathway into peroxisome and exit of the product from the organelle could pose a problem. As was discussed above, many low molecular weight substances freely penetrate the peroxisomal membrane in both directions through the peroxisomal channel (pore) protein Pxmp2, whereas large molecular weight metabolites, such as coenzymes, penetrate the peroxisome via specific transport proteins (Antonenkov and Hiltunen 2012). To control the penetration of the required metabolite, a pore channel protein could be engineered and specific proteins for peroxisome transport could be modified for transport to peroxisomes; however, this possibility has not been explored yet. There is an interesting series of studies on expression of a heterologous pathway for penicillin biosynthesis from the mycelium fungus *Penicillium chrysogenum* in the methylotrophic yeast *H. polymorpha* (Gidijala et al. 2007, 2008, 2009). Synthesis of penicillin involves four genes; two of them are encoded cytosolic and the two others are peroxisomally localized enzymes. Expression of all four genes from *P. chrysogenum* in *H. polymorpha* resulted in yeast strains capable of penicillin synthesis. Expression of all four genes in the *pex3* mutant defective in peroxisome biogenesis resulted in a substantial drop in penicillin synthesis. In a similar manner, peroxisomes appeared to be important for penicillin synthesis by the native producer *P. chrysogenum* (Meijer et al. 2010). In general, synthesis of many fungal secondary metabolites occurs at least partially in peroxisomes (Stehlik et al. 2014). Yeasts rarely produce secondary metabolites, although they could be useful hosts for heterologous expression of the corresponding fungal genes, similarly to what was done for penicillin. Yeast peroxisomes appeared to be a suitable organelle for locating enzymes involved in synthesis of polyhydroxyalkanoates (Poirier, Erard and MacDonald-Comber Petétot 2002). It was suggested that peroxisomes could be interesting hosts for biochemical pathways involving CoA-linked intermediates (Stehlik et al. 2014).

As was pointed out above, peroxisomes are important for yeast catabolism of such unusual carbon and nitrogen sources as fatty acids, methanol, D-amino acids, purines, etc. Until recently, the role of peroxisomes in sugar catabolism in yeast was not known. Knock out of *DAS1*, coding for peroxisomal transketolase, known also as dihydroxyacetone synthase, and *TAL2*, coding for peroxisomal transaldolase, did not have any effects on growth on xylose, although it almost totally blocked xylose alcoholic fermentation, similarly to the effect of *pex3* and *pex6* mutations, with no effect on glucose fermentation. At the same time, overexpression of *DAS1* and *TAL2* genes, separately or together, strongly activated ethanol production from xylose. Simultaneous overexpression of *DAS1* and *TAL2* in the advanced ethanol producer from xylose (Kurylenko et al. 2014, 2016) led to further improvement of the main parameters of xylose alcoholic fermentation (yield and productivity) under elevated temperatures of 45°C, suggesting the important role of peroxisomes in maintaining a high efficiency of xylose alcoholic fermentation. It is not known at the moment whether peroxisomes are specifically involved in control of xylose growth and fermentation only in methylotrophic yeasts or also in other yeast organisms. It was also found out that deletion or disruption of the *H. polymorpha* *ATG13* gene encoding autophagy and pexophagy-initiating protein activates xylose (but not glucose)

alcoholic fermentation (Kurylenko et al. 2016). It could be hypothesized that *Atg13* protein is somehow specifically involved, in addition to its role in autophagy, in the control of xylose fermentation in methylotrophic yeasts. The mechanisms of this involvement in xylose metabolism and fermentation remain to be analyzed.

There are interesting data on the importance of yeast general non-specific autophagy in food biotechnology, e.g. during the second fermentation used for production of sparkling wines (Cebollero and Gonzalez 2007). Inhibition of autophagy by benzoic acid could be one of the reasons this compound prevents growth of food-spoiling yeasts (Abeliovich and Gonzalez 2009). To my knowledge, there are very few data on the role of the specific autophagic degradation of peroxisomes (pexophagy) in biotechnology, which includes only the recent finding on activation of xylose fermentation in *atg13Δ* mutants of *H. polymorpha* (Kurylenko et al. 2016). Still, an important role for pexophagy could be easily envisaged: if the metabolic process were to reside inside the peroxisome, it would be important to prevent or slow down the rate of autophagic degradation of this organelle. Therefore, manipulation of the pexophagy process (its retardation or total genetic block) appears to be a very promising approach for future yeast biotechnology.

## GENERAL CONCLUSIONS

The data gathered in this review show that the many aspects of peroxisome biogenesis and protein targeting to this organelle are understood in great detail. This is also the case regarding pexophagy, i.e. the autophagic degradation of peroxisomes. The corresponding studies are among the top focus areas in modern cell biology. Nevertheless, our understanding of the mechanisms of peroxisome biogenesis, division, inheritance and pexophagy are still incomplete, and many important details remain to be elucidated in the near future. We do not know exactly how the size and number of peroxisomes is maintained, when peroxisomes originate from the ER and how cells decide to start peroxisome division. Another intriguing question is the mechanism providing maintenance of at least one peroxisome during massive pexophagy induced, for example, after a shift of methanol-grown cells to glucose medium in methylotrophic yeasts. Yeast peroxisomes could be promising compartments for expression of foreign biotechnologically important proteins or complete metabolic pathways for production of certain metabolites. Peroxisomes are important for catabolism of numerous carbon and nitrogen sources in yeasts and could be involved in biosynthesis of some primary and secondary metabolites. Recent data show the importance of this organelle for metabolism of the most abundant pentose and the second most abundant carbon source in nature after glucose, xylose. Modulation of activities of peroxisomal enzymes and peroxisome volume could be promising approaches for activation of xylose alcoholic fermentation, which is an important biotechnological issue.

## SUPPLEMENTARY DATA

Supplementary data are available at FEMSYR online.

## ACKNOWLEDGEMENTS

This work was supported in part by the program 'Molecular and Cellular Biotechnologies for Medicine, Industry and Agriculture' of the National Academy of Sciences of Ukraine,

grant No. 31F 'Mechanisms of degradation of peroxisomal and cytosolic proteins in methylotrophic yeasts'. The author is grateful to Kostyantyn V. Dmytruk (Institute of Cell Biology, NAS of Ukraine, Lviv), Justyna Ruchala (University of Rzeszow, Poland) and Anastasiya A. Sybirna (Trinity College, Cambridge University, UK) for critical reading of the manuscript.

**Conflict of interest.** None declared.

## REFERENCES

- Abdelraheim SR, Cartwright JL, Gasmi L et al. The NADH diphosphatase encoded by the *Saccharomyces cerevisiae* NPY1 nudix hydrolase gene is located in peroxisomes. *Arch Biochem Biophys* 2001;**388**:18–24.
- Abeliovich H, Gonzalez R. Autophagy in food biotechnology. *Autophagy* 2009;**5**:925–9.
- Agne B, Meindl NM, Niederhoff K et al. Pex8p: an intraperoxisomal organizer of the peroxisomal import machinery. *Mol Cell* 2003;**11**:635–46.
- Aksam EB, Koek A, Kiel JA et al. A peroxisomal lon protease and peroxisome degradation by autophagy play key roles in vitality of *Hansenula polymorpha* cells. *Autophagy* 2007;**3**:96–105.
- Aksam EB, de Vries B, van der Klei IJ et al. Preserving organelle vitality: peroxisomal quality control mechanisms in yeast. *FEMS Yeast Res* 2009;**9**:808–20.
- Altmann K, Frank M, Neumann D et al. The class V myosin motor protein, Myo2, plays a major role in mitochondrial motility in *Saccharomyces cerevisiae*. *J Cell Biol* 2008;**181**:119–30.
- Ano Y, Hattori T, Oku M et al. A sorting nexin PpAtg24 regulates vacuolar membrane dynamics during pexophagy via binding to phosphatidylinositol-3-phosphate. *Mol Biol Cell* 2005;**16**:446–57.
- Antonenkova VD, Mindthoff S, Grunau S et al. An involvement of yeast peroxisomal channels in transmembrane transfer of glyoxylate cycle intermediates. *Int J Biochem Cell Biol* 2009;**41**:2546–54.
- Antonenkova VD, Hiltunen JK. Transfer of metabolites across the peroxisomal membrane. *Biochim Biophys Acta* 2012;**1822**:1374–86.
- Arai Y, Hayashi M, Nishimura M. Proteomic identification and characterization of a novel peroxisomal adenine nucleotide transporter supplying ATP for fatty acid beta-oxidation in soybean and *Arabidopsis*. *Plant Cell* 2008;**20**:3227–40.
- Aranovich A, Hua R, Rutenberg AD et al. PEX16 contributes to peroxisome maintenance by constantly trafficking PEX3 via the ER. *J Cell Sci* 2014;**127**:3675–86.
- Baerends RJ, Faber KN, Kiel JA et al. Sorting and function of peroxisomal membrane proteins. *FEMS Microbiol Rev* 2000;**24**:291–301.
- Baker A, Carrier DJ, Schaedler T et al. Peroxisomal ABC transporters: functions and mechanism. *Biochem Soc Trans* 2015;**43**:959–65.
- Barreto L, Garcerá A, Jansson K et al. A peroxisomal glutathione transferase of *Saccharomyces cerevisiae* is functionally related to sulfur amino acid metabolism. *Eukaryot Cell* 2006;**5**:1748–59.
- Bartoszewska M, Opaliński L, Veenhuis M et al. The significance of peroxisomes in secondary metabolite biosynthesis in filamentous fungi. *Biotechnol Lett* 2011;**33**:1921–31.
- Bellu AR, Komori M, van der Klei IJ et al. Peroxisome biogenesis and selective degradation converge at Pex14p. *J Biol Chem* 2001a;**276**:44570–4.
- Bellu AR, Kram AM, Kiel JA et al. Glucose-induced and nitrogen-starvation-induced peroxisome degradation are distinct processes in *Hansenula polymorpha* that involve both common and unique genes. *FEMS Yeast Res* 2001;**1**:23–31.
- Breitling R, Sharif O, Hartman ML et al. Loss of compartmentalization causes misregulation of lysine biosynthesis in peroxisome-deficient yeast cells. *Eukaryot Cell* 2002;**1**:978–86.
- Burnett SF, Farré JC, Nazarko TY et al. Peroxisomal Pex3 activates selective autophagy of peroxisomes via interaction with the pexophagy receptor Atg30. *J Biol Chem* 2015;**290**:8623–31.
- Cebollero E, Gonzalez R. Autophagy: from basic research to its application in food biotechnology. *Biotechnol Adv* 2007;**25**:396–409.
- Cartwright JL, Gasmi L, Spiller DG et al. The *Saccharomyces cerevisiae* PCD1 gene encodes a peroxisomal nudix hydrolase active toward coenzyme A and its derivatives. *J Biol Chem* 2000;**275**:32925–30.
- Cavalier-Smith T. The simultaneous symbiotic origin of mitochondria, chloroplasts and microbodies. *Ann NY Acad Sci* 1987;**503**:55–71.
- Cereghino JL, Cregg JM. Heterologous protein expression in the methylotrophic yeast *Pichia pastoris*. *FEMS Microbiol Rev* 2000;**24**:45–66.
- Chang J, Tower RJ, Lancaster DL et al. Dynein light chain interaction with the peroxisomal import docking complex modulates peroxisome biogenesis in yeast. *J Cell Sci* 2013;**126**:4698–706.
- Ciniawsky S, Grimm I, Saffian D et al. Molecular snapshots of the Pex1/6 AAA+ complex in action. *Nat Commun*. 2015;**6**:7331.
- Cohen Y, Klug YA, Dimitrov L et al. Peroxisomes are juxtaposed to strategic sites on mitochondria. *Mol Biosyst* 2014;**10**:1742–8.
- David C, Koch J, Oeljeklaus S et al. A combined approach of quantitative interaction proteomics and live-cell imaging reveals a regulatory role for endoplasmic reticulum (ER) reticulon homology proteins in peroxisome biogenesis. *Mol Cell Proteomics* 2013;**12**:2408–25.
- Dimitrov L, Lam SK, Schekman R. The role of the endoplasmic reticulum in peroxisome biogenesis. *Cold Spring Harb Perspect Biol* 2013;**5**:a013243.
- Dunn WA, Jr, Cregg JM, Kiel JA et al. Pexophagy: the selective autophagy of peroxisomes. *Autophagy* 2005;**1**:75–83.
- Elgersma Y, van den Berg M, Tabak HF et al. An efficient positive selection procedure for the isolation of peroxisomal import and peroxisome assembly mutants of *Saccharomyces cerevisiae*. *Genetics* 1993;**135**:731–40.
- Erdmann R. Assembly, maintenance and dynamics of peroxisomes. *Biochim Biophys Acta* 2016;**1863**:787–9.
- Erdmann R, Veenhuis M, Mertens D et al. Isolation of peroxisome-deficient mutants of *Saccharomyces cerevisiae*. *Proc Natl Acad Sci USA* 1989;**86**:5419–23.
- Faber KN, Westra S, Waterham HR et al. Foreign gene expression in *Hansenula polymorpha*. A system for the synthesis of small functional peptides. *Appl Microbiol Biotechnol* 1996;**45**:72–9.
- Fagarasanu M, Fagarasanu A, Tam YY et al. Inp1p is a peroxisomal membrane protein required for peroxisome inheritance in *Saccharomyces cerevisiae*. *J Cell Biol* 2005;**169**:765–75.
- Fagarasanu A, Fagarasanu M, Eitzen GA et al. The peroxisomal membrane protein Inp2p is the peroxisome-specific receptor for the myosin V motor Myo2p of *Saccharomyces cerevisiae*. *Dev Cell* 2006;**10**:587–600.
- Fagarasanu A, Mast FD, Knoblach B et al. Myosin-driven peroxisome partitioning in *S. cerevisiae*. *J Cell Biol* 2009;**186**:541–54.

- Fagarasanu A, Mast FD, Knoblach B et al. Molecular mechanisms of organelle inheritance: lessons from peroxisomes in yeast. *Nat Rev Mol Cell Biol* 2010;**11**:644–54.
- Farré JC, Subramani S. Peroxisome turnover by micropexophagy: an autophagy-related process. *Trends Cell Biol* 2004;**14**:515–23.
- Farré JC, Manjithaya R, Mathewson RD et al. PpAtg30 tags peroxisomes for turnover by selective autophagy. *Dev Cell* 2008;**14**:365–76.
- Farré JC, Krick R, Subramani S et al. Turnover of organelles by autophagy in yeast. *Curr Opin Cell Biol* 2009;**21**:522–30.
- Faust PL, Kovacs WJ. Cholesterol biosynthesis and ER stress in peroxisome deficiency. *Biochimie* 2014;**98**:75–85.
- Freitag J, Ast J, Bölker M. Cryptic peroxisomal targeting via alternative splicing and stop codon read-through in fungi. *Nature* 2012;**485**:522–5.
- Fry MR, Thomson JM, Tomasini AJ et al. Early and late molecular events of glucose-induced pexophagy in *Pichia pastoris* require Vac8. *Autophagy* 2006;**2**:280–8.
- Gabalón T. Peroxisome diversity and evolution. *Philos Trans R Soc B: Biol Sci* 2010;**365**:765–73.
- Gardner BM, Chowdhury S, Lander GC et al. The Pex1/Pex6 complex is a heterohexameric AAA+ motor with alternating and highly coordinated subunits. *J Mol Biol* 2015;**427**:1375–88.
- Gidijala L, van der Klei IJ, Veenhuis M et al. Reprogramming *Hansenula polymorpha* for penicillin production: expression of the *Penicillium chrysogenum* *pcl* gene. *FEMS Yeast Res* 2007;**7**:1160–7.
- Gidijala L, Bovenberg RA, Klaassen P et al. Production of functionally active *Penicillium chrysogenum* isopenicillin N synthase in the yeast *Hansenula polymorpha*. *BMC Biotechnol* 2008;**8**:29.
- Gidijala L, Kiel JA, Douma RD et al. An engineered yeast efficiently secreting penicillin. *PLoS One* 2009;**4**:e8317.
- Gould SJ, Keller GA, Hosken N et al. A conserved tripeptide sorts proteins to peroxisomes. *J Cell Biol* 1989;**108**:1657–64.
- Grunau S, Mindthoff S, Rottensteiner H et al. Channel-forming activities of peroxisomal membrane proteins from the yeast *Saccharomyces cerevisiae*. *FEBS J* 2009;**276**:1698–708.
- Hagen S, Drepper F, Fischer S et al. Structural insights into cargo recognition by the yeast PTS1 receptor. *J Biol Chem* 2015;**290**:26610–26.
- Heiland I, Erdmann R. Biogenesis of peroxisomes. Topogenesis of the peroxisomal membrane and matrix proteins. *FEBS J* 2005;**272**:2362–72.
- Hoepfner D, van den Berg M, Philippsen P et al. A role for Vps1p, actin, and the Myo2p motor in peroxisome abundance and inheritance in *Saccharomyces cerevisiae*. *J Cell Biol* 2001;**155**:979–90.
- Hoepfner D, Schildknecht D, Braakman I et al. Contribution of the endoplasmic reticulum to peroxisome formation. *Cell* 2005;**122**:85–95.
- Höfeld J, Veenhuis M, Kunau WH. PAS3, a *Saccharomyces cerevisiae* gene encoding a peroxisomal integral membrane protein essential for peroxisome biogenesis. *J Cell Biol* 1991;**114**:1167–78.
- Horiguchi H, Yurimoto H, Kato N et al. Antioxidant system within yeast peroxisome. Biochemical and physiological characterization of CbPmp20 in the methylotrophic yeast *Candida boidinii*. *J Biol Chem* 2001;**276**:14279–88.
- Idnurm A, Giles SS, Perfect JR et al. Peroxisome function regulates growth on glucose in the basidiomycete fungus *Cryptococcus neoformans*. *Eukaryot Cell* 2007;**6**:60–72.
- Jamieson DJ. Oxidative stress responses of the yeast *Saccharomyces cerevisiae*. *Yeast* 1998;**14**:1511–27.
- Johnson MA, Waterham HR, Ksheminska GP et al. Positive selection of novel peroxisome biogenesis-defective mutants of the yeast *Pichia pastoris*. *Genetics* 1999;**151**:1379–91.
- Kal AJ, van Zonneveld AJ, Benes V et al. Dynamics of gene expression revealed by comparison of serial analysis of gene expression transcript profiles from yeast grown on two different carbon sources. *Mol Biol Cell* 1999;**10**:1859–72.
- Kabran P, Rossignol T, Gaillardin C et al. Alternative splicing regulates targeting of malate dehydrogenase in *Yarrowia lipolytica*. *DNA Res* 2012;**19**:231–44.
- Kiel JA, Veenhuis M, van der Klei IJ. PEX genes in fungal genomes: common, rare or redundant. *Traffic* 2006;**7**:1291–303.
- Kiel JA. Autophagy in unicellular eukaryotes. *Philos Trans R Soc B: Biol Sci* 2010;**365**:819–30.
- Kim PK, Hettema EH. Multiple pathways for protein transport to peroxisomes. *J Mol Biol* 2015;**427**:1176–90.
- Knoblach B, Sun X, Coquelle N et al. An ER–peroxisome tether exerts peroxisome population control in yeast. *EMBO J* 2013;**32**:2439–53.
- Knoblach B, Rachubinski RA. Phosphorylation-dependent activation of peroxisome proliferator protein PEX11 controls peroxisome abundance. *J Biol Chem* 2010;**285**:6670–80.
- Knoblach B, Rachubinski RA. Sharing the cell's bounty—organelle inheritance in yeast. *J Cell Sci* 2015;**128**:621–30.
- Knoops K, de Boer R, Kram A et al. Yeast pex1 cells contain peroxisomal ghosts that import matrix proteins upon reintroduction of Pex1. *J Cell Biol* 2015;**211**:955–62.
- Knoops K, Manivannan S, Cepinska MN et al. Preperoxisomal vesicles can form in the absence of Pex3. *J Cell Biol* 2014;**204**:659–68.
- Kohlwein SD, Veenhuis M, van der Klei IJ. Lipid droplets and peroxisomes: key players in cellular lipid homeostasis or a matter of fat—store 'em up or burn 'em down. *Genetics* 2013;**193**:1–50.
- Krasovska OS, Stasyk OV, Sibirny AA. Stable overproducer of hepatitis B surface antigen in the methylotrophic yeast *Hansenula polymorpha* due to multiple integration of heterologous auxotrophic selective markers and defect in peroxisome biogenesis. *Appl Microbiol Biotechnol* 2013;**97**:9969–79.
- Kumar S, Singh R, Williams CP et al. Stress exposure results in increased peroxisomal levels of yeast Pnc1 and Gpd1, which are imported via a piggy-backing mechanism. *Biochim Biophys Acta* 2016;**1863**:148–56.
- Kunze M, Pracharoenwattana I, Smith SM et al. A central role for the peroxisomal membrane in glyoxylate cycle function. *Biochim Biophys Acta* 2006;**1763**:1441–52.
- Kuravi K, Nagotu S, Krikken AM et al. Dynamin-related proteins Vps1p and Dnm1p control peroxisome abundance in *Saccharomyces cerevisiae*. *J Cell Sci* 2006;**119**:3994–4001.
- Kurylenko OO, Ruchala J, Hryniv OB et al. Metabolic engineering and classical selection of the methylotrophic thermotolerant yeast *Hansenula polymorpha* for improvement of high-temperature xylose alcoholic fermentation. *Microb Cell Fact* 2014;**13**:122.
- Kurylenko O, Semkiv M, Ruchala J et al. New approaches for improving the production of the 1st and 2nd generation ethanol by yeast. *Acta Biochim Pol* 2016;**63**:31–8.
- Lametschwandtner G, Brocard C, Fransen M et al. The difference in recognition of terminal tripeptides as peroxisomal targeting signal 1 between yeast and human is due to different affinities of their receptor Pex5p to the cognate signal and to residues adjacent to it. *J Biol Chem* 1998;**273**:33635–43.
- Lazarow PB, Fujiki Y. Biogenesis of peroxisomes. *Annu Rev Cell Biol* 1985;**1**:489–530.

- Leao-Helder AN, Krikken AM, van der Klei IJ et al. Transcriptional down-regulation of peroxisome numbers affects selective peroxisome degradation in *Hansenula polymorpha*. *J Biol Chem* 2003;278:40749–56.
- Leão-Helder AN, Krikken AM, Lunenborg MG et al. *Hansenula polymorpha* Tup1p is important for peroxisome degradation. *FEMS Yeast Res* 2004;4:789–94.
- Léon S, Goodman JM, Subramani S. Uniqueness of the mechanism of protein import into the peroxisome matrix: transport of folded, co-factor-bound and oligomeric proteins by shuttling receptors. *Biochim Biophys Acta* 2006a;1763:1552–64.
- Léon S, Zhang L, McDonald WH et al. Dynamics of the peroxisomal import cycle of PpPex20p: ubiquitin-dependent localization and regulation. *J Cell Biol* 2006b;172:67–78.
- Lin-Cereghino GP, Godfrey L, de la Cruz BJ et al. Mxr1p, a key regulator of the methanol utilization pathway and peroxisomal genes in *Pichia pastoris*. *Mol Cell Biol* 2006;26:883–97.
- Liu H, Tan X, Veenhuis M et al. An efficient screen for peroxisome-deficient mutants of *Pichia pastoris*. *J Bacteriol* 1992;174:4943–51.
- Lüers GH, Advani R, Wenzel T et al. The *Pichia pastoris* dihydroxyacetone kinase is a PTS1-containing, but cytosolic, protein that is essential for growth on methanol. *Yeast* 1998;14:759–71.
- Ma C, Subramani S. Peroxisome matrix and membrane protein biogenesis. *IUBMB Life* 2009;61:713–22.
- Magliano P, Flippi M, Sanglard D et al. Characterization of the *Aspergillus nidulans* biotin biosynthetic gene cluster and use of the bioDA gene as a new transformation marker. *Fungal Genet Biol* 2011;48:208–15.
- Manjithaya R, Nazarko TY, Farré JC et al. Molecular mechanism and physiological role of pexophagy. *FEBS Lett* 2010;584:1367–73.
- Maruyama J, Kitamoto K. Expanding functional repertoires of fungal peroxisomes: contribution to growth and survival processes. *Front Physiol* 2013;4:177.
- Marzioch M, Erdmann R, Veenhuis M et al. PAS7 encodes a novel yeast member of the WD-40 protein family essential for import of 3-oxoacyl-CoA thiolase, a PTS2-containing protein, into peroxisomes. *EMBO J* 1994;13:4908–18.
- Mattiazzi Ušaj M, Brložnik M, Kaferle P et al. Genome-wide localization study of yeast Pex11 identifies peroxisome-mitochondria interactions through the ERMES complex. *J Mol Biol* 2015;427:2072–87.
- Meijer WH, Gidijala L, Fekken S et al. Peroxisomes are required for efficient penicillin biosynthesis in *Penicillium chrysogenum*. *Appl Environ Microbiol* 2010;76:5702–9.
- Michels PA, Moyersoen J, Krazy H et al. Peroxisomes, glyoxysomes and glycosomes (review). *Mol Membr Biol* 2005;22:133–45.
- Mindthoff S, Grunau S, Steinfort LL et al. Peroxisomal Pex11 is a pore-forming protein homologous to TRPM channels. *Biochim Biophys Acta* 2016;1863:271–83.
- Monastyrska I, Kiel JA, Krikken AM et al. The *Hansenula polymorpha* ATG25 gene encodes a novel coiled-coil protein that is required for macropexophagy. *Autophagy* 2005;1:92–100.
- Motley AM, Hetteema EH. Yeast peroxisomes multiply by growth and division. *J Cell Biol* 2007;178:399–410.
- Motley AM, Ward GP, Hetteema EH. Dnm1p-dependent peroxisome fission requires Caf4p, Mdv1p and Fis1p. *J Cell Sci* 2008;121:1633–40.
- Moyersoen J, Choe J, Fan E et al. Biogenesis of peroxisomes and glycosomes: trypanosomatid glycosome assembly is a promising new drug target. *FEMS Microbiol Rev* 2004;28:603–43.
- Mukaiyama H, Oku M, Baba M et al. Paz2 and 13 other PAZ gene products regulate vacuolar engulfment of peroxisomes during micropexophagy. *Genes Cells* 2002;7:75–90.
- Mukaiyama H, Baba M, Osumi M et al. Modification of a ubiquitin-like protein Paz2 conducted micropexophagy through formation of a novel membrane structure. *Mol Biol Cell* 2004;15:58–70.
- Munck JM, Motley AM, Nuttall JM et al. A dual function for Pex3p in peroxisome formation and inheritance. *J Cell Biol* 2009;187:463–71.
- Muntau AC, Roscher AA, Kunau WH et al. The interaction between human PEX3 and PEX19 characterized by fluorescence resonance energy transfer (FRET) analysis. *Eur J Cell Biol* 2003;82:333–42.
- Nagotu S, Saraya R, Otzen M et al. Peroxisome proliferation in *Hansenula polymorpha* requires Dnm1p which mediates fission but not de novo formation. *Biochim Biophys Acta* 2008;1783:760–9.
- Nagotu S, Veenhuis M, van der Klei IJ. Divide et impera: the dictum of peroxisomes. *Traffic* 2010;11:175–84.
- Nair DM, Purdue PE, Lazarow PB. Pex7p translocates in and out of peroxisomes in *Saccharomyces cerevisiae*. *J Cell Biol* 2004;167:599–604.
- Nazarko TY. Atg37 regulates the assembly of the pexophagic receptor protein complex. *Autophagy* 2014;10:1348–9.
- Nazarko TY, Farré JC, Polupanov AS et al. Autophagy-related pathways and specific role of sterol glucoside in yeasts. *Autophagy* 2007a;3:263–5.
- Nazarko TY, Polupanov AS, Manjithaya RR et al. The requirement of sterol glucoside for pexophagy in yeast is dependent on the species and nature of peroxisome inducers. *Mol Biol Cell* 2007b;18:106–18.
- Nazarko VY, Futej KO, Thevelein JM et al. Differences in glucose sensing and signaling for pexophagy between the baker's yeast *Saccharomyces cerevisiae* and the methylotrophic yeast *Pichia pastoris*. *Autophagy* 2008;4:381–4.
- Nazarko VY, Thevelein JM, Sibirny AA. G-protein-coupled receptor Gpr1 and G-protein Gpa2 of cAMP-dependent signaling pathway are involved in glucose-induced pexophagy in the yeast *Saccharomyces cerevisiae*. *Cell Biol Int* 2008;32:502–4.
- Nazarko TY, Farré JC, Subramani S. Peroxisome size provides insights into the function of autophagy-related proteins. *Mol Biol Cell* 2009;20:3828–39.
- Nazarko VY, Nazarko TY, Farré JC et al. Atg35, a micropexophagy-specific protein that regulates micropexophagic apparatus formation in *Pichia pastoris*. *Autophagy* 2011;7:375–85.
- Ohdate T, Inoue Y. Involvement of glutathione peroxidase 1 in growth and peroxisome formation in *Saccharomyces cerevisiae* in oleic acid medium. *Biochim Biophys Acta* 2012;1821:1295–305.
- Oku M, Warnecke D, Noda T et al. Peroxisome degradation requires catalytically active sterol glucosyltransferase with a GRAM domain. *EMBO J* 2003;22:3231–41.
- Oku M, Sakai Y. Pexophagy in yeasts. *Biochim Biophys Acta* 2016;1863:992–8.
- Olivier LM, Krisans SK. Peroxisomal protein targeting and identification of peroxisomal targeting signals in cholesterol biosynthetic enzymes. *Biochim Biophys Acta* 2000;1529:89–102.
- Opaliński Ł, Kiel JA, Williams C et al. Membrane curvature during peroxisome fission requires Pex11. *EMBO J* 2011;30:5–16.

- Otzen M, Wang D, Lunenborg MG et al. *Hansenula polymorpha* Pex20p is an oligomer that binds the peroxisomal targeting signal 2 (PTS2). *J Cell Sci* 2005;**118**:3409–18.
- Palmieri L, Rottensteiner H, Girzalsky W et al. Identification and functional reconstitution of the yeast peroxisomal adenine nucleotide transporter. *EMBO J* 2001;**20**:5049–59.
- Pashkova N, Jin Y, Ramaswamy S et al. Structural basis for myosin V discrimination between distinct cargoes. *EMBO J* 2006;**25**:693–700.
- Peng Y, Weisman LS. The cyclin-dependent kinase Cdk1 directly regulates vacuole inheritance. *Dev Cell* 2008;**15**:478–85.
- Platta HW, Erdmann R. The peroxisomal protein import machinery. *FEBS Lett* 2007;**581**:2811–9.
- Poirier Y, Erard N, MacDonald-Comber Petétot J. Synthesis of polyhydroxyalkanoate in the peroxisome of *Pichia pastoris*. *FEMS Microbiol Lett* 2002;**207**:97–102.
- Polupanov AS, Nazarko VY, Sibirny AA. Gss1 protein of the methylotrophic yeast *Pichia pastoris* is involved in glucose sensing, pexophagy and catabolite repression. *Int J Biochem Cell Biol* 2012;**44**:1906–18.
- Polupanov AS, Sibirny AA. Cytoplasmic extension peptide of *Pichia pastoris* glucose sensor Gss1 is not compulsory for glucose signalling. *Cell Biol Int* 2014;**38**:172–8.
- Pu J, Ha CW, Zhang S et al. Interactomic study on interaction between lipid droplets and mitochondria. *Protein Cell* 2011;**2**:487–96.
- Rachubinski RA, Subramani S. How proteins penetrate peroxisomes. *Cell* 1995;**83**:525–8.
- Rayapuram N, Subramani S. The importomer—a peroxisomal membrane complex involved in protein translocation into the peroxisome matrix. *Biochim Biophys Acta* 2006;**1763**:1613–9.
- Raychaudhuri S, Prinz WA. Nonvesicular phospholipid transfer between peroxisomes and the endoplasmic reticulum. *Proc Natl Acad Sci USA* 2008;**105**:15785–90.
- Rußmayer H, Buchetics M, Gruber C et al. Systems-level organization of yeast methylotrophic lifestyle. *BMC Biol* 2015;**13**:80.
- Sacksteder KA, Jones JM, South ST et al. PEX19 binds multiple peroxisomal membrane proteins, is predominantly cytoplasmic, and is required for peroxisome membrane synthesis. *J Cell Biol* 2000;**148**:931–44.
- Sakai Y, Oku M, van der Klei IJ et al. Pexophagy: autophagic degradation of peroxisomes. *Biochim Biophys Acta* 2006;**1763**:1767–75.
- Sasano Y, Yurimoto H, Yanaka M et al. Trm1p, a Zn(II)2Cys6-type transcription factor, is a master regulator of methanol-specific gene activation in the methylotrophic yeast *Candida boidinii*. *Eukaryot Cell* 2008;**7**:527–36.
- Sasano Y, Yurimoto H, Kuriyama M et al. Trm2p-dependent derepression is essential for methanol-specific gene activation in the methylotrophic yeast *Candida boidinii*. *FEMS Yeast Res* 2010;**10**:535–44.
- Schlüter A, Fourcade S, Ripp R et al. The evolutionary origin of peroxisomes: an ER–peroxisome connection. *Mol Biol Evol* 2006;**23**:838–45.
- Schrader M, Fahimi HD. The peroxisome: still a mysterious organelle. *Histochem Cell Biol* 2008;**129**:421–40.
- Schrader M, Bonekamp NA, Islinger M. Fission and proliferation of peroxisomes. *Biochim Biophys Acta* 2012;**1822**:1343–57.
- Schrader M, Grille S, Fahimi HD et al. Peroxisome interactions and cross-talk with other subcellular compartments in animal cells. In: del Rio LA, ed. *Peroxisomes and their Key Role in Cellular Signaling and Metabolism*. Berlin: Springer, 2013, 1–22.
- Schrader M, Godinho LF, Costello JL et al. The different facets of organelle interplay—an overview of organelle interactions. *Front Cell Dev Biol*. 2015;**3**:56.
- Sellers JR, Veigel C. Walking with myosin V. *Curr Opin Cell Biol* 2006;**18**:68–73.
- Sibirny AA. Mechanisms of autophagy and pexophagy in yeasts. *Biochemistry* 2011;**76**:1279–90.
- Sibirny AA. Molecular mechanisms of peroxisome biogenesis in yeasts. *Mol Biol* 2012;**46**:11–26.
- Sibirny AA. Pexophagy sensing and signaling in the methylotrophic yeasts. In: Brocard C, Hartig A (eds). *Molecular Machines Involved in Peroxisome Biogenesis and Maintenance*. Berlin: Springer, 2014, 507–27.
- Stanley WA, Filipp FV, Kursula P et al. Recognition of a functional peroxisome type 1 target by the dynamic import receptor pex5p. *Mol Cell* 2006;**24**:653–63.
- Stasyk OV, Nazarko TY, Stasyk OG et al. Sterol glucosyltransferases have different functional roles in *Pichia pastoris* and *Yarrowia lipolytica*. *Cell Biol Int* 2003;**27**:947–52.
- Stasyk OV, Stasyk OG, Mathewson RD et al. Atg28, a novel coiled-coil protein involved in autophagic degradation of peroxisomes in the methylotrophic yeast *Pichia pastoris*. *Autophagy* 2006;**2**:30–8.
- Stasyk OG, van Zutphen T, Ah Kang H et al. The role of *Hansenula polymorpha* MIG1 homologues in catabolite repression and pexophagy. *FEMS Yeast Res* 2007;**7**:1103–13.
- Stehlik T, Sandrock B, Ast J et al. Fungal peroxisomes as biosynthetic organelles. *Curr Opin Microbiol* 2014;**22**:8–14.
- Stevens P, Monastyrska I, Leão-Helder AN et al. *Hansenula polymorpha* Vam7p is required for macropexophagy. *FEMS Yeast Res* 2005;**5**:985–97.
- Strijbis K, van den Burg J, Visser WF et al. Alternative splicing directs dual localization of *Candida albicans* 6-phosphogluconate dehydrogenase to cytosol and peroxisomes. *FEMS Yeast Res* 2012;**12**:61–8.
- Suzuki K. Selective autophagy in budding yeast. *Cell Death Differ* 2013;**20**:43–8.
- Tam YY, Fagarasanu A, Fagarasanu M et al. Pex3p initiates the formation of a preperoxisomal compartment from a subdomain of the endoplasmic reticulum in *Saccharomyces cerevisiae*. *J Biol Chem* 2005;**280**:34933–9.
- Tanabe Y, Maruyama J, Yamaoka S et al. Peroxisomes are involved in biotin biosynthesis in *Aspergillus* and *Arabidopsis*. *J Biol Chem* 2011;**286**:30455–61.
- Thoms S. Import of proteins into peroxisomes: piggybacking to a new home away from home. *Open Biol* 2015;**5**:150148.
- Thoms S, Debelyy MO, Nau K et al. Lpx1p is a peroxisomal lipase required for normal peroxisome morphology. *FEBS J* 2008;**275**:504–14.
- Thoms S, Erdmann R. Dynamin-related proteins and Pex11 proteins in peroxisome division and proliferation. *FEBS J* 2005;**272**:5169–81.
- Thoms S, Harms I, Kalies KU et al. Peroxisome formation requires the endoplasmic reticulum channel protein Sec 61. *Traffic* 2012;**13**:59–609.
- Till A, Lakhani R, Burnett SF et al. Pexophagy: the selective degradation of peroxisomes. *Int J Cell Biol* 2012;**2012**:1–18.
- Titorenko VI, Ogrzydziak DM, Rachubinski RA. Four distinct secretory pathways serve protein secretion, cell surface growth, and peroxisome biogenesis in the yeast *Yarrowia lipolytica*. *Mol Cell Biol* 1997;**17**:5210–26.
- Titorenko VI, Rachubinski RA. Mutants of the yeast *Yarrowia lipolytica* defective in protein exit from the endoplasmic

- reticulum are also defective in peroxisome biogenesis. *Mol Cell Biol* 1998;**18**:2789–803.
- Tower RJ, Fagarasanu A, Aitchison JD *et al.* The peroxin Pex34p functions with the Pex11 family of peroxisomal divisional proteins to regulate the peroxisome population in yeast. *Mol Cell Biol* 2011;**22**:1727–38.
- Tuttle DL, Dunn WA, Jr. Divergent modes of autophagy in the methylotrophic yeast *Pichia pastoris*. *J Cell Sci* 1995;**108**:25–35.
- van der Klei IJ, Harder W, Veenhuis M. Methanol metabolism in a peroxisome-deficient mutant of *Hansenula polymorpha*: a physiological study. *Arch Microbiol* 1991;**156**:15–23.
- van der Klei IJ, Yurimoto H, Sakai Y *et al.* The significance of peroxisomes in methanol metabolism in methylotrophic yeast. *Biochim Biophys Acta* 2006;**1763**:1453–62.
- van der Zand A, Gent J, Braakman I *et al.* Biochemically distinct vesicles from the endoplasmic reticulum fuse to form peroxisomes. *Cell* 2012;**149**:397–409.
- van Dijk R, Faber KN, Kiel JA *et al.* The methylotrophic yeast *Hansenula polymorpha*: a versatile cell factory. *Enzyme Microb Technol* 2000;**26**:793–800.
- van Roermund CW, Elgersma Y, Singh N *et al.* The membrane of peroxisomes in *Saccharomyces cerevisiae* is impermeable to NAD(H) and acetyl-CoA under in vivo conditions. *EMBO J* 1995;**14**:3480–6.
- van Roermund CW, Waterham HR, Ijlst L *et al.* Fatty acid metabolism in *Saccharomyces cerevisiae*. *Cell Mol Life Sci* 2003;**60**:1838–51.
- van Zutphen T, van der Klei IJ, Kiel JA. Pexophagy in *Hansenula polymorpha*. *Methods Enzymol* 2008;**451**:197–215.
- van Zutphen T, Baerends RJ, Susanna KA *et al.* Adaptation of *Hansenula polymorpha* to methanol: a transcriptome analysis. *BMC Genomics* 2010;**11**:1.
- Veenhuis M, Van Dijken JP, Harder W. The significance of peroxisomes in the metabolism of one-carbon compounds in yeasts. *Adv Microb Physiol* 1983;**24**:1–82.
- Veenhuis M, van der Klei IJ. A critical reflection on the principles of peroxisome formation in yeast. *Front Physiol* 2014;**5**:1–8.
- Wanders RJ, Waterham HR. Peroxisomal disorders: the single peroxisomal enzyme deficiencies. *Biochim Biophys Acta* 2006;**1763**:1707–20.
- Wang X, Unruh MJ, Goodman JM. Discrete targeting signals direct Pmp47 to oleate-induced peroxisomes in *Saccharomyces cerevisiae*. *J Biol Chem* 2001;**276**:10897–905.
- Wang X, Cai M, Shi L *et al.* PpNrg1 is a transcriptional repressor for glucose and glycerol repression of AOX1 promoter in methylotrophic yeast *Pichia pastoris*. *Biotechnol Lett* 2016;**38**:291–18.
- Verleur N, Wanders RJ. Permeability properties of peroxisomes in digitonin-permeabilized rat hepatocytes. Evidence for free permeability towards a variety of substrates. *Eur J Biochem* 1993;**218**:75–82.
- Yamashita S, Oku M, Wasada Y *et al.* PI4P-signaling pathway for the synthesis of a nascent membrane structure in selective autophagy. *J Cell Biol* 2006;**173**:709–17.
- Yuan W, Tuttle DL, Shi YJ *et al.* Glucose-induced microautophagy in *Pichia pastoris* requires the alpha-subunit of phosphofruktokinase. *J Cell Sci* 1997;**110**:1935–45.
- Yuan W, Veenhuis M, van der Klei IJ. The birth of yeast peroxisomes. *Biochim Biophys Acta* 2016;**1863**:902–10.
- Zhang L, Léon S, Subramani S. Two independent pathways traffic the intraperoxisomal peroxin PpPex8p into peroxisomes: mechanism and evolutionary implications. *Mol Biol Cell* 2006;**17**:690–9.
